# Supplementary material for: Lipid–Protein Interactions in Niemann–Pick Type C Disease: Insights from Molecular Modeling
Source: Int J Mol Sci. 2019 Feb 7;20(3):717. doi: 10.3390/ijms20030717 (PMC6387118; doi:10.3390/ijms20030717)
Supplement: Supplementary file 1 [file ijms-20-00717-s001.zip › ijms-437724-supp table.pdf]

| Protein, region | Lipid       | Cluster (members) <sup>a</sup> | Mean binding energy (kcal/mol) | Status                          | Position Interactions (side-chain van der Waals unless stated)                                                                                      | Member shown in text |
|-----------------|-------------|--------------------------------|--------------------------------|---------------------------------|-----------------------------------------------------------------------------------------------------------------------------------------------------|----------------------|
| NPC1, SSD       | Cholesterol | 1 (74)                         | -9.50                          | Parallel, favoured              | Luminal<br>Asp620 (side-chain, H-bond), Val 621, Val624, Val625, Tyr628, Leu665, Val668, Ile687, Glu688, Pro691                                     | 1 (-0.38)            |
|                 |             | 2 (4)                          | -9.42                          | Parallel, favoured              | Luminal<br>Ser627 (side-chain, H-bond), Val 621, Val624, Val625, Ala629, Tyr628 Phe632, Ile687, Glu688, Pro691                                      |                      |
|                 |             | 4 (3)                          | -8.93                          | Anti-parallel, disfavoured      | -                                                                                                                                                   |                      |
|                 |             | 5 (7)                          | -8.51                          | Parallel, favoured              | Cytosolic <sup>b</sup><br>Ile654, Ile361Ala695, Leu663, Ser655, Cys778, Leu782, Leu785, Asp786 (side-chain, H-bond), Arg789                         | 1 (-0.25)            |
|                 |             | 6 (10)                         | -8.25                          | Anti-parallel, disfavoured      | -                                                                                                                                                   |                      |
|                 | Sphingosine | 1 (115)                        | -5.67                          | Parallel, favoured              | Luminal<br>Ser627 (backbone, H-bond), Asp620 (side-chain, H-bond), Val 621, Val625, Tyr628, Ile687, Glu688, Pro691, Phe1221                         | 1 (-1.36)            |
|                 |             | 2 (47)                         | -5.53                          | Parallel, favoured              | Luminal<br>Ser617 (backbone, H-bond), Asp620 (side-chain, H-bond), Val 624, Val668, Leu672, Val686, Ile687, Leu682, Glu688, Ile690, Pro691, Phe1221 |                      |
|                 |             | 3 (24)                         | -5.59                          | Parallel, favoured              | Luminal<br>Ser617, Asp620 (side-chain, H-bond), Val621, Val 624, Tyr628, Leu665, Val668, Ala669, Glu688 (side-chain, H-bond), Pro691, Phe1221       |                      |
|                 |             | 4 (22)                         | -5.30                          | Parallel, favoured              | Luminal<br>Asp620 (side-chain, H-bond), Val621, Val 624, Val625, Tyr628, Phe632, Leu665, Glu688, Pro691, Phe1221                                    |                      |
|                 |             | 5 (5)                          | -5.26                          | Parallel, favoured              | Luminal<br>Asp620 (side-chain, H-bond), Val621, Val 624, Val625, Tyr628, Phe632, Ile687, Glu688, Pro691, Phe1221                                    |                      |
|                 |             | 6 (8)                          | -4.43                          | Parallel, favoured              | Luminal<br>Asp620, Val 624, Tyr628, Leu665, Ile687, Glu688 (side-chain, H-bond), Pro691, Leu695, Phe1221                                            |                      |
|                 |             | 7 (5)                          | -3.99                          | Anti-parallel, disfavoured      | -                                                                                                                                                   |                      |
|                 |             | 8 (13)                         | -4.54                          | Parallel, favoured              | Cytosolic <sup>b</sup><br>Ile354, Ile361, Ser655, Ile662, Ile663, Leu665, Cys778, Leu785, Asp786, Arg789, Asp796 (side-chain and backbone, H-bonds) | 3 (-0.76)            |
|                 |             | 9 (5)                          | -4.76                          | Perpendicular, Disfavoured      | -                                                                                                                                                   |                      |
|                 |             | 10 (10)                        | -4.34                          | Parallel, favoured              | Luminal<br>Ser617 (side-chain and backbone, H-bonds), Asp620 (side-chain, H-bond), Val621, Val 624, Val625, Tyr628, Ile687                          |                      |
|                 |             | 11 (8)                         | -4.11                          | Anti-parallel, disfavoured      | -                                                                                                                                                   |                      |
|                 |             | 12 (9)                         | -4.39                          | Parallel, favoured              | Luminal<br>Ser617 (side-chain and backbone, H-bonds), Asp618, Val621, Val 624, Tyr628, Phe632, Leu684, Pro691                                       |                      |
|                 |             | 13 (8)                         | -4.38                          | Perpendicular, Disfavoured      | -                                                                                                                                                   |                      |
| BK, CRAC2       | Cholesterol | 1 (109)                        | -6.26                          | Displaced parallel, disfavoured | -                                                                                                                                                   |                      |
|                 |             | 2 (72)                         | -6.05                          | Parallel, favoured              | Lys211 (side-chain, H-bond), Leu215, Val223, Leu226, Val255, Val262, Tyr263, Asn265 (side-chain, H-bond)                                            | 22 (-0.27)           |
|                 |             | 3 (56)                         | -6.05                          | Parallel, favoured              | Leu215, Val223, Leu226, Val255, Val262 (side-chain, H-bond and van der Waals), Tyr263, Asn265 (side-chain, H-bond)                                  |                      |
|                 |             | 4 (6)                          | -5.49                          | Parallel, favoured              | Lys211 (side-chain, H-bond), Leu215, Val223, Leu226, Val255, Val262, Tyr263 (side-chain, CH- $\pi$ )                                                | 4 (+0.34)            |
|                 |             | 5 (3)                          | -5.57                          | Perpendicular, disfavoured      | -                                                                                                                                                   |                      |

| Protein, region        | Lipid         | Cluster (members) <sup>a</sup> | Mean binding energy (kcal/mol) | Status                          | Position Interactions (side-chain van der Waals unless stated)                      | Member shown in text |
|------------------------|---------------|--------------------------------|--------------------------------|---------------------------------|-------------------------------------------------------------------------------------|----------------------|
| BK, CRAC2              | Cholesterol   | 8 (7)                          | -5.63                          | Displaced parallel, disfavoured | -                                                                                   |                      |
|                        |               | 9 (5)                          | -4.68                          | Anti-parallel, disfavoured      | -                                                                                   |                      |
|                        |               | 10 (3)                         | -4.93                          | Displaced parallel, disfavoured | -                                                                                   |                      |
|                        |               | 11 (17)                        | -5.14                          | Anti-parallel, disfavoured      | -                                                                                   |                      |
| TRPML1, Juxta-membrane | SM head group | 1 (2)                          | -3.40                          | Splayed Disfavoured             | -                                                                                   |                      |
|                        |               | 2 (2)                          | -3.04                          | Anti-parallel, disfavoured      | -                                                                                   |                      |
|                        |               | 3 (3)                          | -2.60                          | Splayed Disfavoured             | -                                                                                   |                      |
|                        |               | 4 (3)                          | -2.35                          | Anti-parallel, disfavoured      | -                                                                                   |                      |
|                        |               | 6 (2)                          | -2.53                          | Anti-parallel, disfavoured      | -                                                                                   |                      |
|                        |               | 7 (2)                          | -3.12                          | Splayed Disfavoured             | -                                                                                   |                      |
|                        |               | 8 (2)                          | -3.05                          | Perpendicular, disfavoured      | -                                                                                   |                      |
|                        |               | 9 (8)                          | -1.41                          | Anti-parallel, disfavoured      | -                                                                                   |                      |
|                        |               | 11 (5)                         | -2.76                          | Anti-parallel, disfavoured      | -                                                                                   |                      |
|                        |               | 12 (6)                         | -1.71                          | Parallel, favoured              | Asp114 (side-chain, H-bond), Glu276 (side-chain, ionic), Arg486 (side chain, ionic) | 1 (-1.63)            |
|                        |               | 14 (4)                         | -2.21                          | Anti-parallel, disfavoured      | -                                                                                   |                      |
|                        |               | 15 (3)                         | -3.02                          | Splayed Disfavoured             | -                                                                                   |                      |
|                        |               | 16 (2)                         | -2.71                          | Perpendicular, disfavoured      | -                                                                                   |                      |
|                        |               | 17 (3)                         | -1.45                          | Perpendicular, disfavoured      | -                                                                                   |                      |
|                        |               | 20 (3)                         | -1.41                          | Splayed Disfavoured             | -                                                                                   |                      |
|                        |               | 21 (7)                         | -1.73                          | Anti-parallel, disfavoured      | -                                                                                   |                      |
|                        |               | 22 (2)                         | -2.50                          | Splayed Disfavoured             | -                                                                                   |                      |
|                        |               | 23 (2)                         | -1.92                          | Anti-parallel, disfavoured      | -                                                                                   |                      |
|                        |               | 25 (2)                         | -2.37                          | Perpendicular, disfavoured      | -                                                                                   |                      |
|                        |               | 28 (4)                         | -1.84                          | Anti-parallel, disfavoured      | -                                                                                   |                      |
|                        |               | 29 (3)                         | -1.44                          | Perpendicular, disfavoured      | -                                                                                   |                      |
|                        |               | 31 (2)                         | -2.37                          | Perpendicular, disfavoured      | -                                                                                   |                      |

| Protein, region | Lipid                                        | Cluster (members) <sup>a</sup> | Mean binding energy (kcal/mol) | Status                     | Position Interactions (side-chain van der Waals unless stated)                                                                             | Member shown in text |
|-----------------|----------------------------------------------|--------------------------------|--------------------------------|----------------------------|--------------------------------------------------------------------------------------------------------------------------------------------|----------------------|
| TRPML1, agonist | PI(3,5)P <sub>2</sub> headgroup <sup>c</sup> | 1 (27)                         | -17.40                         | Parallel, favoured         | Lys55 (side-chain, ionic), Arg67 (side-chain, ionic), Lys65 (side-chain, ionic), Arg318 (side-chain, ionic)                                |                      |
|                 | PI(4,5)P <sub>2</sub> headgroup <sup>c</sup> | 2 (22)                         | -19.11                         | Parallel, favoured         | Lys55 (side-chain, ionic), Arg67 (side-chain, ionic), Lys65 (side-chain, ionic), Arg318 (side-chain, ionic)                                |                      |
|                 | SM headgroup <sup>c</sup>                    | 8 (9)                          | -6.05                          | Parallel, favoured         | Lys55 (side-chain, ionic), Arg67 (side-chain, H-bond), Lys65 (side-chain, ionic), Arg318 (side-chain, H-bond), Arg322 (side-chain, H-bond) |                      |
| AnxA2           | PI(4,5)P <sub>2</sub> headgroup <sup>d</sup> | 1 (1)                          | -7.82                          | Parallel, favoured         | Lys279 (side-chain, ionic), Lys281 (side chain, ionic and H-bond), Arg284 (side-chain, ionic)                                              |                      |
|                 |                                              | 2 (4)                          | -7.07                          | Parallel, favoured         | Lys279 (side-chain, ionic and H-bond), Lys281 (side chain, ionic and H-bond), Arg284 (side-chain, ionic)                                   |                      |
|                 |                                              | 3 (4)                          | -4.07                          | Parallel, favoured         | Lys279 (side-chain, ionic and H-bond), Lys281 (side chain, ionic and H-bond; backbone, H-bond), Arg284 (side-chain, ionic)                 |                      |
|                 |                                              | 7 (3)                          | -2.76                          | Parallel, favoured         | Lys279 (side-chain, ionic), Lys281 (side chain, H-bond), Arg284 (side-chain, ionic)                                                        | 2 (+0.18)            |
|                 |                                              | 9 (3)                          | -3.32                          | Parallel, favoured         | Lys281 (side chain, H-bond;), Arg284 (side-chain, ionic)                                                                                   |                      |
|                 |                                              | 10 (2)                         | -4.36                          | Splayed, disfavoured       | -                                                                                                                                          |                      |
|                 |                                              | 13 (2)                         | -4.73                          | Perpendicular, disfavoured | -                                                                                                                                          |                      |
|                 |                                              | 15 (4)                         | -3.48                          | Splayed, disfavoured       | -                                                                                                                                          |                      |
|                 |                                              | 20 (3)                         | -3.62                          | Parallel, favoured         | Lys279 (side chain, H-bond) Lys281 (side chain, H-bond), Arg284 (side-chain, ionic)                                                        |                      |
|                 |                                              | 21 (4)                         | -4.00                          | Parallel, favoured         | Lys279 (side-chain, H-bond), Lys281 (side chain, ionic and H-bond), Arg284 (side-chain, ionic)                                             |                      |
|                 |                                              | 25 (2)                         | -3.40                          | Splayed, disfavoured       | -                                                                                                                                          |                      |
|                 |                                              | 27 (4)                         | -3.58                          | Anti-parallel, disfavoured | -                                                                                                                                          |                      |
|                 |                                              | 38 (2)                         | -3.37                          | Perpendicular, disfavoured | -                                                                                                                                          |                      |
|                 |                                              | 40 (2)                         | -3.88                          | Perpendicular, disfavoured | -                                                                                                                                          |                      |
|                 |                                              | 43 (3)                         | -3.73                          | Perpendicular, disfavoured | -                                                                                                                                          |                      |
|                 |                                              | 44 (3)                         | -3.31                          | Perpendicular, disfavoured | -                                                                                                                                          |                      |
|                 |                                              | 46 (2)                         | -4.02                          | Anti-parallel, disfavoured | -                                                                                                                                          |                      |
|                 |                                              | 50 (3)                         | -3.55                          | Perpendicular, disfavoured | -                                                                                                                                          |                      |
| AnxA2           | SM headgroup                                 | 1 (7)                          | -3.09                          | Anti-parallel, disfavoured | -                                                                                                                                          |                      |
|                 |                                              | 2 (3)                          | -3.34                          | Anti-parallel, disfavoured | -                                                                                                                                          |                      |
|                 |                                              | 3 (3)                          | -3.63                          | Anti-parallel, disfavoured | -                                                                                                                                          |                      |
|                 |                                              | 5 (3)                          | -2.36                          | Anti-parallel, Disfavoured | -                                                                                                                                          |                      |
| AnxA2           | SM                                           | 6 (4)                          | -3.17                          | Anti-parallel,             | -                                                                                                                                          |                      |

| Protein, region              | Lipid                           | Cluster (members) <sup>a</sup> | Mean binding energy (kcal/mol) | Status                     | Position Interactions (side-chain van der Waals unless stated)                                                                                     | Member shown in text |
|------------------------------|---------------------------------|--------------------------------|--------------------------------|----------------------------|----------------------------------------------------------------------------------------------------------------------------------------------------|----------------------|
|                              |                                 |                                |                                | disfavoured                |                                                                                                                                                    |                      |
|                              |                                 | 8 (2)                          | -3.39                          | Perpendicular, disfavoured | -                                                                                                                                                  |                      |
|                              |                                 | 9 (3)                          | -2.55                          | Splayed, disfavoured       | -                                                                                                                                                  |                      |
|                              |                                 | 1 (7)                          | -3.09                          | Anti-parallel, disfavoured | -                                                                                                                                                  |                      |
|                              |                                 | 2 (3)                          | -3.34                          | Anti-parallel, disfavoured | -                                                                                                                                                  |                      |
|                              |                                 | 3 (3)                          | -3.63                          | Anti-parallel, disfavoured | -                                                                                                                                                  |                      |
|                              |                                 | 5 (3)                          | -2.36                          | Splayed, disfavoured       | -                                                                                                                                                  |                      |
|                              |                                 | 6 (4)                          | -3.17                          | Anti-parallel, disfavoured | -                                                                                                                                                  |                      |
|                              |                                 | 8 (2)                          | -3.39                          | Splayed, disfavoured       | -                                                                                                                                                  |                      |
|                              |                                 | 9 (3)                          | -2.55                          | Anti-parallel, disfavoured | -                                                                                                                                                  |                      |
|                              |                                 | 10 (3)                         | -2.83                          | Anti-parallel, disfavoured | -                                                                                                                                                  |                      |
| Stx7/VAMP8, juxta-membrane 1 | PI(3,5)P <sub>2</sub> headgroup | 1 (10)                         | -10.56                         | Parallel, favoured         | Lys68 (VAMP8, side-chain, electrostatic and H-bond), Lys72 (VAMP8, side-chain, electrostatic), Arg235 (Stx7, side-chain, electrostatic and H-bond) | 2 (-2.15)            |
|                              |                                 | 2 (3)                          | -11.58                         | Parallel, favoured         | Lys68 (VAMP8, side-chain, electrostatic), Lys72 (VAMP8, side-chain, electrostatic and H-bond), Arg235 (Stx7, side-chain, electrostatic and H-bond) |                      |
|                              |                                 | 3 (5)                          | -9.99                          | Anti-parallel, disfavoured | -                                                                                                                                                  |                      |
|                              |                                 | 4 (5)                          | -10.70                         | Parallel, favoured         | Lys68 (VAMP8, side-chain, electrostatic), Lys72 (VAMP8, side-chain, electrostatic and H-bond), Arg235 (Stx7, side-chain, electrostatic)            |                      |
|                              |                                 | 5 (2)                          | -12.97                         | Anti-parallel, disfavoured | -                                                                                                                                                  |                      |
|                              |                                 | 6 (2)                          | -13.46                         | Anti-parallel, disfavoured | -                                                                                                                                                  |                      |
|                              |                                 | 7 (6)                          | -9.83                          | Anti-parallel, disfavoured | -                                                                                                                                                  |                      |
|                              |                                 | 8 (6)                          | -10.60                         | Anti-parallel, disfavoured | -                                                                                                                                                  |                      |
|                              |                                 | 9 (10)                         | -9.94                          | Anti-parallel, disfavoured | -                                                                                                                                                  |                      |
|                              |                                 | 10 (7)                         | -10.50                         | Anti-parallel, disfavoured | -                                                                                                                                                  |                      |
|                              |                                 | 11 (8)                         | -9.91                          | Anti-parallel, disfavoured | -                                                                                                                                                  |                      |
|                              |                                 | 12 (4)                         | -10.10                         | Parallel, favoured         | Lys68 (VAMP8, side-chain, electrostatic), Lys72 (VAMP8, side-chain, electrostatic and H-bond), Arg235 (Stx7, side-chain, electrostatic and H-bond) |                      |
|                              |                                 | 14 (8)                         | -10.00                         | Perpendicular, disfavoured | -                                                                                                                                                  |                      |
|                              |                                 | 15 (2)                         | -11.20                         | Parallel, favoured         | Lys68 (VAMP8, side-chain, electrostatic), Lys72 (VAMP8, side-chain, electrostatic), Arg235 (Stx7, side-chain, electrostatic and H-bond)            |                      |
|                              |                                 | 17 (6)                         | -9.97                          | Perpendicular, Disfavoured | -                                                                                                                                                  |                      |

| Protein, region                           | Lipid                           | Cluster (members) <sup>a</sup> | Mean binding energy (kcal/mol) | Status                     | Position Interactions (side-chain van der Waals unless stated)                                                                                     | Member shown in text |
|-------------------------------------------|---------------------------------|--------------------------------|--------------------------------|----------------------------|----------------------------------------------------------------------------------------------------------------------------------------------------|----------------------|
| Stx7/VAMP8, juxta-membrane 1              | PI(3,5)P <sub>2</sub> headgroup | 18 (6)                         | -8.82                          | Anti-parallel, disfavoured | -                                                                                                                                                  |                      |
|                                           |                                 | 19 (6)                         | -11.93                         | Parallel, favoured         | Lys68 (VAMP8, side-chain, electrostatic), Lys72 (VAMP8, side-chain, electrostatic), Arg235 (Stx7, side-chain, electrostatic)                       |                      |
|                                           |                                 | 20 (3)                         | -10.36                         | Parallel, favoured         | Lys68 (VAMP8, side-chain, electrostatic), Lys72 (VAMP8, side-chain, electrostatic), Arg235 (Stx7, side-chain, electrostatic)                       |                      |
|                                           |                                 | 22 (4)                         | -9.91                          | Parallel, favoured         | Lys68 (VAMP8, side-chain, electrostatic and H-bond), Lys72 (VAMP8, side-chain, electrostatic), Arg235 (Stx7, side-chain, electrostatic and H-bond) |                      |
|                                           |                                 | 23 (3)                         | -10.91                         | Perpendicular, disfavoured | -                                                                                                                                                  |                      |
|                                           |                                 | 24 (6)                         | -9.48                          | Parallel, favoured         | Lys68 (VAMP8, side-chain, electrostatic), Lys72 (VAMP8, side-chain, electrostatic), Arg235 (Stx7, side-chain, electrostatic and H-bond)            |                      |
|                                           |                                 | 25 (7)                         | -8.68                          | Parallel, favoured         | Lys68 (VAMP8, side-chain, electrostatic), Lys72 (VAMP8, side-chain, electrostatic and H-bond), Arg235 (Stx7, side-chain, electrostatic and H-bond) |                      |
|                                           |                                 | 26 (5)                         | -9.97                          | Parallel, favoured         | Lys72 (VAMP8, side-chain, electrostatic), Arg235 (Stx7, side-chain, electrostatic)                                                                 |                      |
|                                           |                                 | 28 (2)                         | -11.04                         | Perpendicular, disfavoured | -                                                                                                                                                  |                      |
|                                           |                                 | 30 (9)                         | -9.21                          | Perpendicular, disfavoured | -                                                                                                                                                  |                      |
|                                           |                                 | 31 (4)                         | -9.16                          | Perpendicular, disfavoured | -                                                                                                                                                  |                      |
|                                           |                                 | 32 (5)                         | -9.20                          | Parallel, favoured         | Lys68 (VAMP8, side-chain, electrostatic), Lys72 (VAMP8, side-chain, electrostatic), Arg235 (Stx7, side-chain, electrostatic)                       |                      |
| Stx7/VAMP8, juxta-membrane 2 <sup>e</sup> | PI(3,5)P <sub>2</sub> headgroup | 1 (8)                          | -3.37                          | Perpendicular, disfavoured | -                                                                                                                                                  |                      |
|                                           |                                 | 2 (2)                          | -4.75                          | Parallel, favoured         | Arg67 (VAMP8, side-chain, electrostatic), Lys233 (Stx7, side-chain, H-bond)                                                                        |                      |
|                                           |                                 | 3 (4)                          | -2.75                          | Parallel, favoured         | Arg67 (VAMP8, side-chain, electrostatic), Tyr230 (Stx7, side-chain, H-bond), Lys233 (Stx7, side-chain, electrostatic and H-bond)                   | 1 (-2.50)            |
|                                           |                                 | 4 (18)                         | -2.20                          | Anitparallel, disfavoured  | -                                                                                                                                                  |                      |
|                                           |                                 | 5 (12)                         | -1.92                          | Parallel, favoured         | Lys233 (Stx7, side-chain, electrostatic)                                                                                                           |                      |
|                                           |                                 | 6 (4)                          | -2.76                          | Anitparallel, disfavoured  | -                                                                                                                                                  |                      |
|                                           |                                 | 7 (8)                          | -2.23                          | Anitparallel, disfavoured  | -                                                                                                                                                  |                      |
|                                           |                                 | 8 (6)                          | -2.45                          | Perpendicular, disfavoured | -                                                                                                                                                  |                      |
|                                           |                                 | 9 (8)                          | -2.69                          | Perpendicular, disfavoured | -                                                                                                                                                  |                      |
|                                           |                                 | 10 (5)                         | -3.41                          | Perpendicular, disfavoured | -                                                                                                                                                  |                      |
|                                           |                                 | 11 (4)                         | -3.30                          | Perpendicular, disfavoured | -                                                                                                                                                  |                      |
|                                           |                                 | 12 (3)                         | -2.99                          | Parallel, favoured         | Lys233 (Stx7, side-chain, electrostatic and H-bond)                                                                                                |                      |
|                                           |                                 | 13 (12)                        | -2.65                          | Perpendicular, disfavoured | -                                                                                                                                                  |                      |
|                                           |                                 | 14 (6)                         | -2.87                          | Parallel, favoured         | Lys233 (Stx7, side-chain, electrostatic)                                                                                                           |                      |

| Protein, region | Lipid | Cluster (members) <sup>a</sup> | Mean binding energy (kcal/mol) | Status                     | Position Interactions (side-chain van der Waals unless stated)                         | Member shown in text |
|-----------------|-------|--------------------------------|--------------------------------|----------------------------|----------------------------------------------------------------------------------------|----------------------|
|                 |       | 17 (3)                         | -3.68                          | Parallel, favoured         | Lys233 (Stx7, side-chain, electrostatic)                                               |                      |
|                 |       | 19 (4)                         | -3.41                          | Antiparallel, disfavoured  | -                                                                                      |                      |
|                 |       | 20 (10)                        | -1.62                          | Antiparallel, disfavoured  | -                                                                                      |                      |
|                 |       | 21 (6)                         | -1.97                          | Perpendicular, disfavoured | -                                                                                      |                      |
|                 |       | 22 (6)                         | -2.49                          | Parallel, favoured         | Arg73 (VAMP8, side-chain, electrostatic), Lys233 (Stx7, side-chain, electrostatic)     |                      |
|                 |       | 23 (2)                         | -2.46                          | Perpendicular, disfavoured | -                                                                                      |                      |
|                 |       | 24 (4)                         | -2.28                          | Parallel, favoured         | Asn73 (VAMP8, side-chain, H-bond), Lys233 (Stx7, side-chain, electrostatic and H-bond) |                      |
|                 |       | 25 (3)                         | -1.95                          | Antiparallel, disfavoured  | -                                                                                      |                      |
|                 |       | 26 (16)                        | -2.00                          | Parallel, favoured         | Asn73 (VAMP8, side-chain, H-bond), Lys233 (Stx7, side-chain, electrostatic)            |                      |
|                 |       | 27 (10)                        | -2.16                          | Perpendicular, disfavoured | -                                                                                      |                      |
|                 |       | 28 (2)                         | -3.45                          | Perpendicular, Disfavoured | -                                                                                      |                      |
|                 |       | 29 (12)                        | -2.54                          | Perpendicular, Disfavoured | -                                                                                      |                      |
|                 |       | 30 (4)                         | -2.03                          | Perpendicular, disfavoured | -                                                                                      |                      |

**Table S1 Details of AutoDock output** AutoDock clusters binding poses by RMSD (cut-off > 2.0 Å) and orders clusters by binding energy of most favourable member. For each binding experiment the clusters are given with the number of members of each in parentheses. The mean binding energy is given; AutoDock's margin for error is  $\pm 1.5$  kcal/mol so clusters with mean energies within this margin are energetically indistinguishable. The status of each cluster (assessed as described in main text) is given. The interacting residues for each cluster are listed along with the position in the LEL membrane. The binding pose from each cluster chosen as representative and shown in the main text is indicated; the difference from the mean binding energy of the cluster (kcal/mol) is given in parenthesis – a negative value indicates more favourable and a positive value less favourable.

Notes: <sup>a</sup>Docking experiments generally produce a long 'tail' of small clusters with less favourable binding energies. These are omitted as are clusters with only 1 member.

<sup>b</sup>The smaller size of the clusters aligned to the cytosolic face relative to those aligned to the luminal face is likely a consequence of the larger size of the luminal binding pocket. When cholesterol is positioned randomly at the start of the calculation run it is more likely to be close to the luminal pocket. The energetic favourability of binding poses aligned to the cytosolic face was confirmed by independent docking experiments using ROSIE-Rosetta software ([rosie.rosettacommons.org/ligand\\_docking](http://rosie.rosettacommons.org/ligand_docking), data not shown).

<sup>c</sup>Data given for the most energetically favourable and biologically plausible cluster only. <sup>d</sup>Increasing the RMSD cut-off to 4.0 Å dramatically reduced the number of clusters but clustered some antiparallel binding poses together with parallel ones (data not shown). <sup>e</sup>RMSD cut-off of 2.5 Å was used.
